# Supplementary material
Source: PubMed Central journal article supplement (PMC6545232)
Supplement: NIHMS1515752-supplement-3.pdf [file NIHMS1515752-supplement-3.pdf]

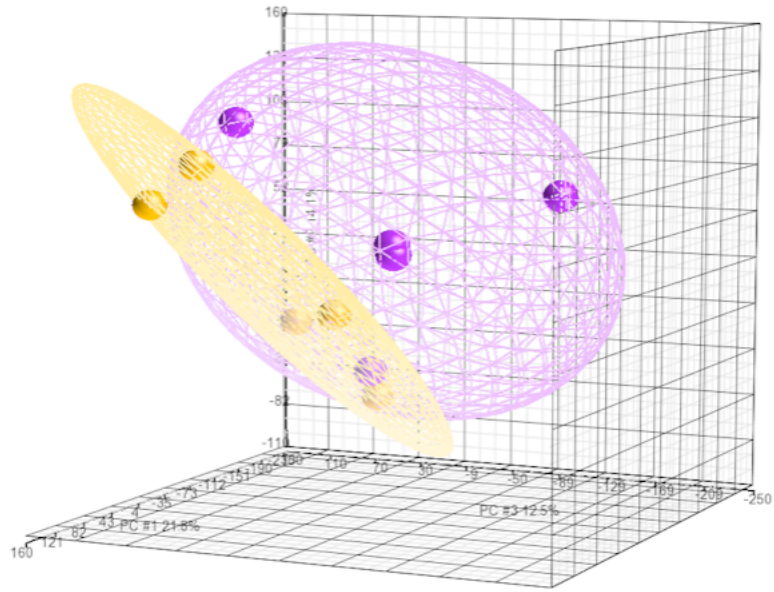

**Supplementary Figure 1. Whole chip unsupervised and total unfiltered Principal Component Analysis.** Yellow spheres represent not progressed patients and purple spheres represent progressed patients.
