# Supplementary material
Source: PubMed Central journal article supplement (PMC6545232)
Supplement: NIHMS1515752-supplement-4.pdf [file NIHMS1515752-supplement-4.pdf]

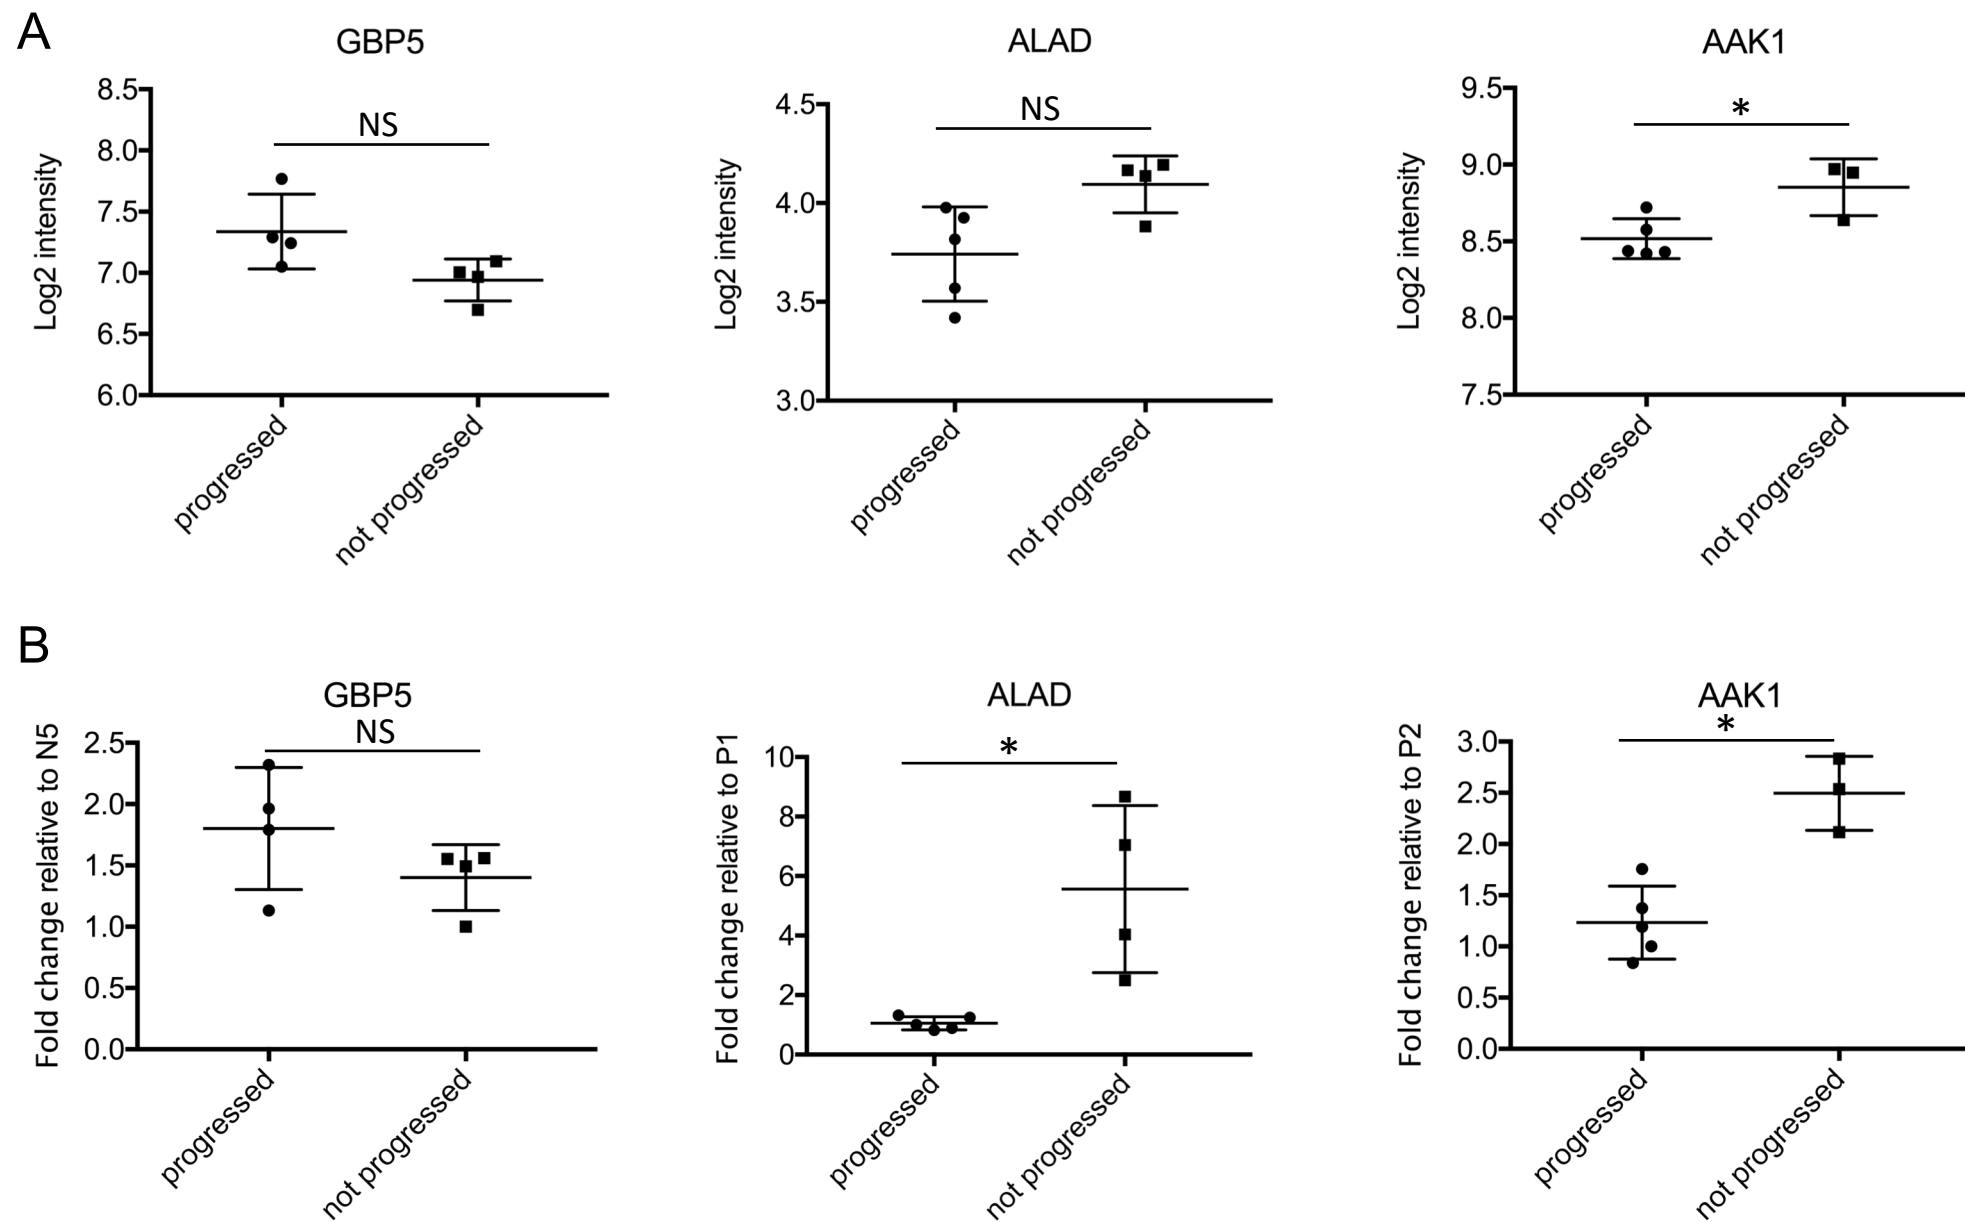

**Supplementary Figure 2. Log2 intensity and quantitative PCR values.** (A) The raw log2 intensity per patient for selected transcripts. (B) Fold change expression per quantitative PCR of the transcripts in A. NS = not significant. \* $p < 0.05$ . p values determined by unpaired non-parametric Mann-Whitney test.
